# Supplementary material for: Analysis of microarrays of miR-34a and its identification of prospective target gene signature in hepatocellular carcinoma
Source: BMC Cancer. 2018 Jan 3;18:12. doi: 10.1186/s12885-017-3941-x (PMC5753510; doi:10.1186/s12885-017-3941-x)
Supplement: Supplementary file 3 — Integrative-analysis of miR-34a target genes and the natural language processing (NLP) results. Twenty-four overlapping genes that are not only associated with the development and progression of HCC but also are the potential miR-34a target genes were obtained in this integrative–analysis (XLSX 14 kb) [file 12885_2017_3941_MOESM3_ESM.xlsx]

## Sheet: Sheet1
Table S3 Integrative-analysis of miR-34a target genes and the natural language processing (NLP) results. Twenty-four overlap genes that are not only associated with the development and progression of HCC but also are the potential miR-34a target genes were obtained in this integrative–analysis
Symbol	PubMed_Count	p-value	Description
ACSL4	3	1.15e-05	acyl-CoA synthetase long-chain family member 4
ARHGAP1	3	5.59e-05	Rho GTPase activating protein 1
ARID1A	4	9.06e-07	AT rich interactive domain 1A (SWI-like)
ATG4B	1	0.036756	ATG4 autophagy related 4 homolog B (S. cerevisiae)
AXL	6	0	AXL receptor tyrosine kinase
BCL2	149	0	B-cell CLL/lymphoma 2
CACNA1C	1	0.15333	calcium channel, voltage-dependent, L type, alpha 1C subunit
CCL22	1	0.096919	chemokine (C-C motif) ligand 22
CCND1	125	1.02e-08	cyclin D1
CCNE2	2	0.00033179	cyclin E2
CD47	1	0.12284	CD47 molecule
CDC25A	6	3.44e-08	cell division cycle 25 homolog A (S. pombe)
CDH13	3	0.00029518	cadherin 13, H-cadherin (heart)
CDK6	10	0	cyclin-dependent kinase 6
CNTN2	1	0.056589	contactin 2 (axonal)
DAB2IP	1	0.03475	DAB2 interacting protein
DDX17	1	0.054624	DEAD (Asp-Glu-Ala-Asp) box polypeptide 17
DPYD	11	0	dihydropyrimidine dehydrogenase
E2F3	5	6.14e-10	E2F transcription factor 3
E2F5	1	0.044739	E2F transcription factor 5, p130-binding
EIF2C4	1	0.014458	eukaryotic translation initiation factor 2C, 4
FMNL2	1	0.016506	formin-like 2
FNDC3B	1	0.016506	fibronectin type III domain containing 3B
FOXG1	2	0.00080042	forkhead box G1
FOXP1	1	0.056589	forkhead box P1
FUT8	2	0.00088342	fucosyltransferase 8 (alpha (1,6) fucosyltransferase)
GNAI2	1	0.15684	guanine nucleotide binding protein (G protein), alpha inhibiting activity polypeptide 2
GRK6	1	0.062459	G protein-coupled receptor kinase 6
HK1	1	0.074089	hexokinase 1
IGFBP3	3	0.024705	insulin-like growth factor binding protein 3
JAG1	2	0.01345	jagged 1 (Alagille syndrome)
KIT	25	0	v-kit Hardy-Zuckerman 4 feline sarcoma viral oncogene homolog
KITLG	3	0.0012485	KIT ligand
KLF4	4	8.24e-06	Kruppel-like factor 4 (gut)
KLRK1	8	0	killer cell lectin-like receptor subfamily K, member 1
LDHA	1	0.087476	lactate dehydrogenase A
LEF1	2	0.011117	lymphoid enhancer-binding factor 1
LIN28B	2	1.29e-05	lin-28 homolog B (C. elegans)
MAP2K1	8	0	mitogen-activated protein kinase kinase 1
MAP2K3	1	0.085576	mitogen-activated protein kinase kinase 3
MET	55	0	met proto-oncogene (hepatocyte growth factor receptor)
MTA2	1	0.056589	metastasis associated 1 family, member 2
MYB	2	0.012259	v-mybmyeloblastosis viral oncogene homolog (avian)
MYCN	3	0.0016409	v-mycmyelocytomatosis viral related oncogene, neuroblastoma derived (avian)
MYRIP	1	0.01855	myosin VIIA and Rab interacting protein
NDRG1	8	0	N-myc downstream regulated gene 1
NOTCH1	20	0	Notch homolog 1, translocation-associated (Drosophila)
NOTCH2	1	0.11367	Notch homolog 2 (Drosophila)
NQO1	1	0.40059	NAD(P)H dehydrogenase, quinone 1
PDGFRA	2	0.037075	platelet-derived growth factor receptor, alpha polypeptide
PEA15	2	0.0024553	phosphoprotein enriched in astrocytes 15
PEG10	4	1.56e-07	paternally expressed 10
PGF	8	1.82e-09	placental growth factor
PLAG1	1	0.050682	pleiomorphic adenoma gene 1
RECK	3	2.25e-05	reversion-inducing-cysteine-rich protein with kazal motifs
RELN	1	0.14625	reelin
SATB1	2	0.0019295	SATB homeobox 1
SERPINE1	10	1.37e-06	serpin peptidase inhibitor, clade E (nexin, plasminogen activator inhibitor type 1), member 1
SIRT1	9	0	sirtuin (silent mating type information regulation 2 homolog) 1 (S. cerevisiae)
SOX4	3	2.83e-05	SRY (sex determining region Y)-box 4
SPRY3	1	0.02059	sprouty homolog 3 (Drosophila)
TMSB10	1	0.042749	thymosin beta 10
TNRC6B	2	0.00023461	trinucleotide repeat containing 6B
VAMP2	1	0.12649	vesicle-associated membrane protein 2 (synaptobrevin 2)
VEGFA	261	0	vascular endothelial growth factor A
WNT1	3	0.00032466	wingless-type MMTV integration site family, member 1
XPO5	1	0.042749	exportin 5
YY1	1	0.17076	YY1 transcription factor
